# Supplementary material for: Ambient Cumulative PM2.5 Exposure and the Risk of Lung Cancer Incidence and Mortality: A Retrospective Cohort Study
Source: MDPI journal article supplement (doi:10.3390/ijerph182312400), 2021-11-25
Supplement: s1 [file s1]

## Supplementary File S1. Statistical Analysis

To investigate the effects of PM<sub>2.5</sub> and fruit or vegetable consumption on the incidence and mortality of lung cancer among all the study participants, Cox proportional hazard models were fitted and adjusted for the following covariates: age at the first health examination visit ( $\geq 50$  or  $< 50$ ), sex (male or female), education level ([high school or lower] or [college or higher]), BMI (kg/m<sup>2</sup>) ( $< 18.5$ , 18.5-24, 24-28, and  $\geq 28$ ), family history of lung cancer (yes or no), vegetable and fruit intake frequency ( $< 2$  servings/day or  $\geq 2$  servings/day), HTN (yes or no), DM (yes or no), CVD (yes or no), stroke (yes or no), eGFR ( $\geq 90$ , 60-90, 45-60, or  $< 45$ ), annual decline in eGFR ( $> 5$  or  $< 5$ ), PM<sub>2.5</sub> exposure (continuous,  $\mu\text{g}/\text{m}^3$ ), and carcinoembryonic antigen (CEA) (continuous, mg/dL) at the first health examination visit.

To investigate the effects of PM<sub>2.5</sub> and fruit and vegetable consumption on mortality of lung cancer among lung cancer patients, we enrolled participants who were diagnosed with lung cancer between 1 Jan 2000 and 31 Dec 2014. All participants were followed up from the baseline until death, or the end of 2015. Cox proportional hazard models were fitted and adjusted for the following covariates: age at diagnosis of lung cancer (continuous, years), sex (male or female), education level ([high school or lower] or [college or higher]), stage at diagnosis of lung cancer ([I or II] or [III or IV]), cancer type (adenocarcinoma or others), and PM<sub>2.5</sub> exposures at diagnosis of lung cancer (continuous,  $\mu\text{g}/\text{m}^3$ ).

The stratified Cox proportional hazards regression which controls by smoking status models the hazard rates for the incidence of LC and LC-related mortality, respectively, which can be specified as:

$$h_j(t \mid X_1, X_2, \dots, X_p) = h_{0j}(t) \cdot \exp(\beta_0 + \beta_1 X_1 + \beta_2 X_2 + \dots + \beta_p X_p), \quad j=1, 2.$$

where  $j=1$  or  $2$  stands for never smokers and ever smokers, respectively. The  $h_{0j}(t)$ ,  $j=1, 2$  are unspecified baseline hazard functions:  $h_{01}(t)$  for never smokers and  $h_{02}(t)$  for ever smokers. Because there are different baseline hazard functions, the fitted stratified Cox model will yield different estimated survival curves of never smokers and ever smokers for the incidence of LC and LC-related mortality, respectively. The Cox regression coefficients  $\beta_1, \beta_2, \dots, \beta_p$  are estimated from the data of the incidence of LC and LC-related mortality, respectively. The covariates,  $X_1, X_2, \dots, X_p$ , which are used to adjust for the hazard function,  $h_j(t \mid X_1, X_2, \dots, X_p)$ , are age at the first health examination visit ( $\geq 50$  or  $< 50$ ), sex (male or female), education level ([high school or lower] or [college or higher]), BMI (kg/m<sup>2</sup>) ( $< 18.5$ , 18.5-24, 24-28, and  $\geq 28$ ), family history of lung cancer (yes or no), vegetable and fruit intake frequency ( $< 2$  servings/day or  $\geq 2$  servings/day), HTN (yes or no), DM (yes or no), CVD (yes or no), stroke (yes or no), eGFR ( $\geq 90$ , 60-90, 45-60, or  $< 45$ ), annual decline in eGFR ( $> 5$  or  $< 5$ ), PM<sub>2.5</sub> exposure

(continuous,  $\mu\text{g}/\text{m}^3$ ), and carcinoembryonic antigen (CEA) (continuous,  $\text{mg}/\text{dL}$ ) at the first health examination visit.

Table S1. The number of lung cancer cases diagnosed by year from 2000 to 2015

| Diagnosis year | No. of lung cancer cases |
|----------------|--------------------------|
| 2000           | 0                        |
| 2001           | 0                        |
| 2002           | 5                        |
| 2003           | 8                        |
| 2004           | 28                       |
| 2005           | 23                       |
| 2006           | 28                       |
| 2007           | 38                       |
| 2008           | 54                       |
| 2009           | 64                       |
| 2010           | 51                       |
| 2011           | 67                       |
| 2012           | 78                       |
| 2013           | 97                       |
| 2014           | 88                       |
| 2015           | 107                      |

**Table S2. The descriptive statistics for the different stages of lung cancer cases**

| Variable                                                                                     | STAGE 1 & STAGE 2  |                            |                          |         | STAGE 3 & STAGE 4  |                            |                           |         |
|----------------------------------------------------------------------------------------------|--------------------|----------------------------|--------------------------|---------|--------------------|----------------------------|---------------------------|---------|
|                                                                                              | Overall<br>(n=231) | Never<br>smoker<br>(n=168) | Ever<br>smoker<br>(n=63) | P value | Overall<br>(n=433) | Never<br>smoker<br>(n=250) | Ever<br>smoker<br>(n=183) | P value |
| Age (years), mean $\pm$ SD                                                                   | 52.17 $\pm$ 12.23  | 51.07 $\pm$ 11.84          | 55.1 $\pm$ 12.86         | 0.0256  | 56.7 $\pm$ 12.29   | 55.17 $\pm$ 12.29          | 58.79 $\pm$ 12.01         | 0.0024  |
| Female, N(%)                                                                                 | 126 (54.55)        | 115 (68.45)                | 11 (17.46)               | <0.001  | 198 (45.73)        | 186 (74.4)                 | 12 (6.56)                 | <0.001  |
| Education level, N(%)                                                                        |                    |                            |                          | 0.0639  |                    |                            |                           | 0.0047  |
| High school or lower                                                                         | 135 (58.44)        | 92 (54.76)                 | 43 (68.25)               |         | 320 (73.9)         | 172 (68.8)                 | 148 (80.87)               |         |
| College or higher                                                                            | 96 (41.56)         | 76 (45.24)                 | 20 (31.75)               |         | 113 (26.1)         | 78 (31.2)                  | 35 (19.13)                |         |
| Body mass index (kg/m <sup>2</sup> ), N(%)                                                   |                    |                            |                          | 0.9377  |                    |                            |                           | 0.2956  |
| < 18.5                                                                                       | 13 (5.63)          | 9 (5.36)                   | 4 (6.35)                 |         | 21 (4.85)          | 12 (4.8)                   | 9 (4.92)                  |         |
| 18.5-23.9                                                                                    | 138 (59.74)        | 101 (60.12)                | 37 (58.73)               |         | 240 (55.43)        | 148 (59.2)                 | 92 (50.27)                |         |
| 24-27.9                                                                                      | 66 (28.57)         | 47 (27.98)                 | 19 (30.19)               |         | 132 (30.48)        | 70 (28)                    | 62 (33.88)                |         |
| $\geq 28$                                                                                    | 14 (6.06)          | 11 (6.55)                  | 3 (4.76)                 |         | 40 (9.24)          | 20 (8)                     | 20 (10.93)                |         |
| eGFR (ml/min/1.73m <sup>2</sup> ), N(%)                                                      |                    |                            |                          | 0.0084  |                    |                            |                           | 0.3739  |
| $\geq 90$                                                                                    | 48 (20.78)         | 43 (25.6)                  | 5 (7.94)                 |         | 88 (20.32)         | 53 (21.2)                  | 35 (19.13)                |         |
| 60 – 89                                                                                      | 162 (70.13)        | 114 (67.86)                | 48 (76.19)               |         | 291 (67.21)        | 170 (68)                   | 121 (66.12)               |         |
| 45 – 59                                                                                      | 19 (8.23)          | 10 (6)                     | 9 (14.29)                |         | 48 (10.88)         | 25 (10)                    | 22 (12.02)                |         |
| < 45                                                                                         | 2 (0.87)           | 1 (0.6)                    | 1 (1.59)                 |         | 7 (1.59)           | 2 (0.8)                    | 5 (2.73)                  |         |
| eGFR annual decline $\geq 5$ (ml/min/1.73m <sup>2</sup> ), N(%)                              | 22 (9.52)          | 18 (10.71)                 | 4 (6.35)                 | 0.3141  | 47 (10.85)         | 26 (10.4)                  | 21 (11.48)                | 0.7223  |
| CEA <sup>a</sup> (mg/dL), mean $\pm$ SD                                                      | 1.92 $\pm$ 1.59    | 1.66 $\pm$ 1.56            | 2.59 $\pm$ 1.45          | <0.001  | 2.61 $\pm$ 3.95    | 2.11 $\pm$ 4.81            | 3.3 $\pm$ 2.12            | 0.0006  |
| Family history of LC, N (%)                                                                  | 21 (9.09)          | 14 (8.33)                  | 7 (11.11)                | 0.5131  | 30 (6.93)          | 17 (6.8)                   | 13 (7.1)                  | 0.9021  |
| Comorbidities, N (%)                                                                         |                    |                            |                          |         |                    |                            |                           |         |
| Hypertension                                                                                 | 36 (15.58)         | 22 (13.1)                  | 14 (22.22)               | 0.0885  | 84 (19.4)          | 50 (20)                    | 34 (18.58)                | 0.7119  |
| Diabetic mellitus                                                                            | 16 (6.93)          | 8 (4.76)                   | 8 (12.7)                 | 0.0344  | 41 (9.71)          | 22 (8.8)                   | 19 (10.38)                | 0.5785  |
| CVD                                                                                          | 14 (6.06)          | 9 (5.36)                   | 5 (7.94)                 | 0.4643  | 41 (9.47)          | 27 (10.8)                  | 14 (7.65)                 | 0.2688  |
| CVA                                                                                          | 2 (0.87)           | 1 (0.6)                    | 1 (1.59)                 | 0.4686  | 4 (0.92)           | 1 (0.4)                    | 3 (1.63)                  | 0.183   |
| Fruit/vegetable $\geq 2$ servings per day, N(%)                                              | 210 (90.91)        | 159 (94.64)                | 51 (80.95)               | 0.0013  | 405 (93.53)        | 242 (96.8)                 | 163 (89.07)               | 0.0012  |
| PM <sub>2.5</sub> exposure ( $\mu\text{g}/\text{m}^3$ ), median $\pm$ IQR, N(%) <sup>b</sup> | 20.2 $\pm$ 6.65    | 20.15 $\pm$ 6.4            | 20.2 $\pm$ 6.75          | 0.9235  | 20.2 $\pm$ 6.9     | 20.3 $\pm$ 6.15            | 19.9 $\pm$ 9.2            | 0.0066  |
| < 17.6                                                                                       | 59 (25.54)         | 42 (25)                    | 17 (26.98)               |         | 110 (25.4)         | 51 (20.4)                  | 59 (32.24)                |         |
| 17.6 $\leq$ PM <sub>2.5</sub> < 22.95                                                        | 103 (44.59)        | 76 (45.24)                 | 27 (42.86)               |         | 193 (44.57)        | 116 (46.4)                 | 77 (42.08)                |         |
| 22.95 $\leq$ PM <sub>2.5</sub> < 25.2                                                        | 32 (13.85)         | 24 (14.29)                 | 8 (12.7)                 |         | 58 (13.39)         | 35 (14)                    | 23 (12.57)                |         |
| $\geq 25.2$                                                                                  | 37 (16.02)         | 26 (15.48)                 | 11 (17.46)               |         | 72 (16.63)         | 48 (19.2)                  | 24 (13.11)                |         |
| Time to event (years), median $\pm$ IQR                                                      | 9.5 $\pm$ 5.54     | 9.35 $\pm$ 5.89            | 9.7 $\pm$ 4.26           | 0.9191  | 8.31 $\pm$ 5.81    | 8.3 $\pm$ 6.44             | 8.55 $\pm$ 5.5            | 0.5487  |
| Types of LC diagnosis, N(%) <sup>c</sup>                                                     |                    |                            |                          | <0.001  |                    |                            |                           | <0.001  |
| Small-cell                                                                                   | 2 (0.87)           | 0 (0)                      | 2 (3.17)                 |         | 27 (6.24)          | 2 (0.8)                    | 25 (13.66)                |         |
| Adenocarcinoma                                                                               | 192 (83.12)        | 148 (88.1)                 | 44 (69.84)               |         | 290 (66.97)        | 205 (82)                   | 85 (46.45)                |         |
| Squamous cell                                                                                | 19 (8.23)          | 5 (2.98)                   | 14 (22.22)               |         | 52 (12.01)         | 12 (4.8)                   | 40 (21.86)                |         |

|                       |            |            |            |        |             |            |             |        |
|-----------------------|------------|------------|------------|--------|-------------|------------|-------------|--------|
| Others                | 18 (7.79)  | 15 (8.93)  | 3 (4.76)   |        | 64 (14.78)  | 31 (12.4)  | 33 (18.03)  |        |
| All-cause death, N(%) | 40 (17.32) | 25 (14.88) | 15 (23.81) | 0.1102 | 314 (72.52) | 167 (66.8) | 147 (80.33) | 0.0018 |

Note: There were a total of 736 participants developing lung cancer during the studied period. Among them, 72 participants did not have stage information of lung cancer from the cancer registry. The number of lung cancer cases from stage 1 to stage 4 are 201 (30.27%), 30 (4.52%), 121 (18.22%) and 312 (46.99%), respectively.
